# Supplementary material
Source: PubMed Central journal article supplement (PMC3370579)
Supplement: supp_80.6.2212_IAI-IAI06348-11-s01.pdf [file supp_80.6.2212_IAI-IAI06348-11-s01.pdf]

## Supplementary data

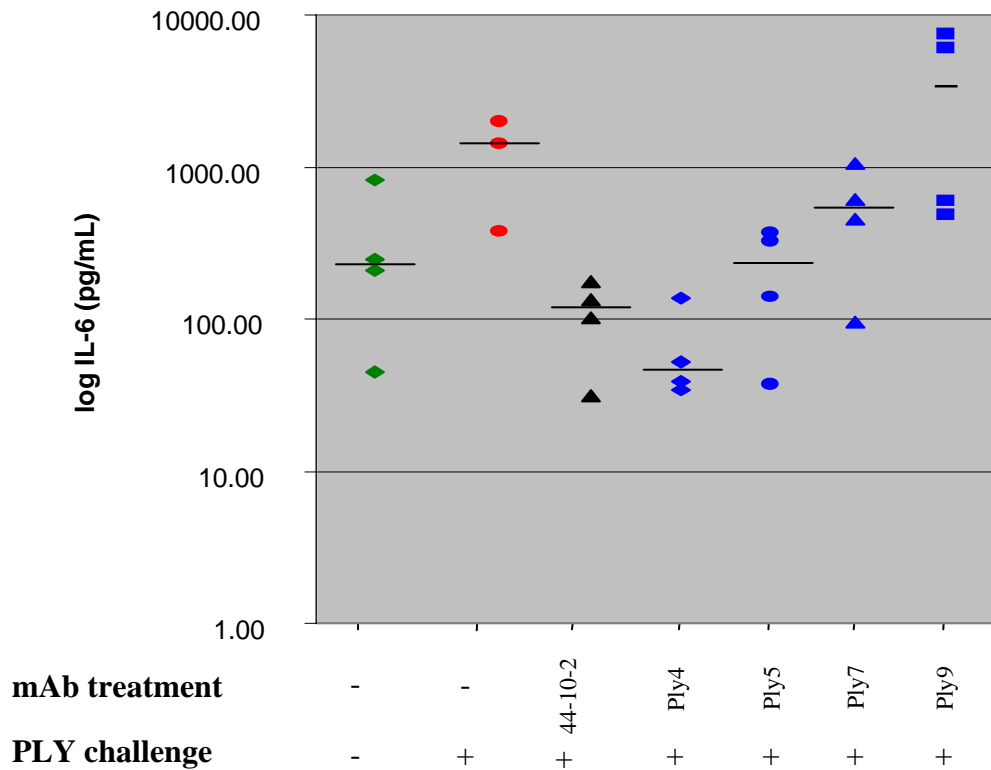

**Supplementary Fig. 1. Monoclonal anti-PLY neutralizing antibodies PLY4, PLY5, PLY7 reduced *in vivo* PLY-mediated inflammation.** Serum IL6 levels in mice challenged IN with untreated PLY or PLY preincubated with either neutralizing mAbs (44-10-2, PLY4, PLY5, or PLY7 at 20 $\mu$ g each) or non-neutralizing anti-PLY mAb (PLY9 at 20 $\mu$ g). As a negative control, IL6 levels were also determined in mock challenged mice that received only PBS/15% glycerol IN.
