# Supplementary material
Source: PubMed Central journal article supplement (PMC3370579)
Supplement: supp_80.6.2212_IAI-IAI06348-11-s02.pdf [file supp_80.6.2212_IAI-IAI06348-11-s02.pdf]

## Supplementary data

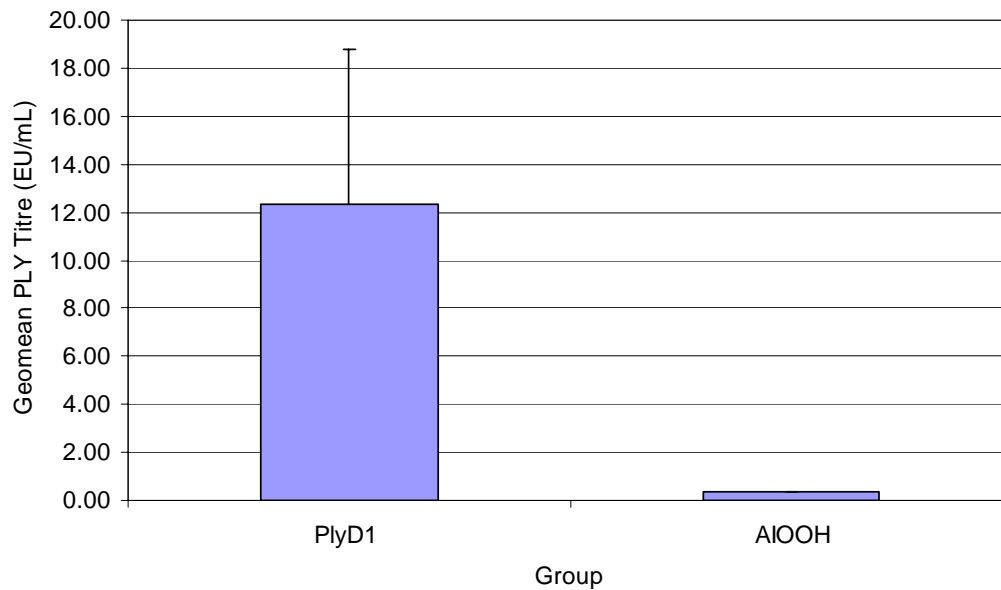

**Supplementary Fig. 2. Presence of anti-PLY antibodies in the BAL of PlyD1-immunized mice.** BAL from five mice immunized with PlyD1 (1 week following the third boost) was collected according to the procedure described in materials and methods for anti-PLY IgG titer detection. Antibody titers to PLY were determined by ELISA, using the procedure described in materials and methods. Since we expected low antibody titers, the BAL was started at a neat concentration. Control AIOOH group refers to aluminum hydroxide adjuvant immunized mice that were also tested for the presence of anti-PLY antibodies in their BAL as a negative control.
