# Supplementary material
Source: PubMed Central journal article supplement (PMC3370579)
Supplement: supp_80.6.2212_IAI-IAI06348-11-s03.pdf [file supp_80.6.2212_IAI-IAI06348-11-s03.pdf]

## Supplementary data

**Supplementary Table 1:** Lung damage score in mock- or PlyD1 immunized mice following challenge with PLY

| Study | Immunization | IN Challenge | No. of mice | Lung damage score per lobe (median) | <i>p</i> -value * |
|-------|--------------|--------------|-------------|-------------------------------------|-------------------|
| 1     | 10 ug PlyD1  | PLY 5μg dose | 10          | 1.8                                 | <i>p</i> <0.05    |
|       | Tris-saline  | PLY 5μg dose | 10          | 2.9                                 |                   |
| 2     | 10 μg PlyD1  | PLY 5μg dose | 10          | 1.5                                 | <i>P</i> =0.0038  |
|       | AlOOH        | PLY 5μg dose | 8           | 5.5                                 |                   |
| 3     | 10 μg PlyD1  | PLY 5μg dose | 15          | 1.5                                 | <i>p</i> <0.05    |
|       | AlOOH        | PLY 5μg dose | 15          | 6                                   |                   |

\*The *p* value was determined by using the Wilcoxon test, where PlyD1 immunized mice were compared to mock immunized mice
