# Supplementary material
Source: PubMed Central journal article supplement (PMC3370579)
Supplement: supp_80.6.2212_IAI-IAI06348-11-s04.pdf [file supp_80.6.2212_IAI-IAI06348-11-s04.pdf]

## Supplementary data

**Supplementary Table 2:** Minimal inhibitory concentration of neutralizing and non-neutralizing anti-PLY monoclonal antibodies

| Monoclonal antibodies | Minimal Inhibitory Concentration ( $\mu\text{g/mL}$ )* |
|-----------------------|--------------------------------------------------------|
| 1-5-3                 | >3,710.00                                              |
| 24-10-9               | >3,710.00                                              |
| 40-8-1                | >3,710.00                                              |
| 44-10-2               | 4.30                                                   |
| Ply4                  | 0.68                                                   |
| Ply5                  | 2.85                                                   |
| Ply7                  | 5.33                                                   |
| Ply9                  | 830.0                                                  |

\* Minimal Inhibitory Concentration (MIC) is the minimal concentration of protein needed to completely inhibit the hemolytic activity of 28ng of a recombinant PLY standard in a 100ul volume of 0.5% sheep red blood cells. The minimal hemolytic activity of the PLY standard is 2 ng in a 100ul volume of 0.5% sheep red blood cells.
